# Supplementary material for: Nkx2‐5 Is Expressed in Atherosclerotic Plaques and Attenuates Development of Atherosclerosis in Apolipoprotein E–Deficient Mice
Source: PubMed Central journal article supplement (PMC5210424; doi:10.1161/jaha.116.004440), 2016-12-19
Supplement: JAH3-5-e004440-s001.pdf [file JAH3-5-e004440-s001.pdf]

# **SUPPLEMENTAL MATERIAL**

**Table S1. qRT-PCR primers used**

| <b>Gene</b>  | <b>Forward primer</b>   | <b>Reverse primer</b>    |
|--------------|-------------------------|--------------------------|
| TNF $\alpha$ | CCCAGGGACCTCTCTCTAATC   | ATGGGCTACAGGCTTGTCCT     |
| IFN $\gamma$ | TCGGTAACTGACTTGAATGTCCA | TCGCTTCCCTGTTTTAGCTGC    |
| IL1A         | TGGTAGTAGCAACCAACGGGA   | ACTTTGATTGAGGGCGTCATTC   |
| IL1B         | TTCGACACATGGGATAACGAGG  | TTTTTGCTGTGAGTCCCGGAG    |
| IL6          | ACTCACCTCTTCAGAACGAATTG | CCATCTTTGGAAGGTTTCAGGTTG |
| IL10         | GACTTTAAGGGTTACCTGGGTTG | TCACATGCGCCTTGATGTCTG    |
| IL12A        | ATGGCCCTGTGCCTTAGTAGT   | AGCTTTGCATTCATGGTCTTGA   |
| IL12B        | ACCCTGACCATCCAAGTCAAA   | TTGGCCTCGCATCTTAGAAAG    |
| IL18         | TCTTCATTGACCAAGGAAATCGG | TCCGGGGTGCATTATCTCTAC    |
| IL19         | ATCCAAGCTAAGGACACCTTCC  | GTCACGCAGCACACATCTAAG    |
| IL20         | ATGAAAGCCTCTAGTCTTGCCT  | GCCCCGTATCTCAGAAAATCC    |
| IL37         | TTCTTTGCATTAGCCTCATCCTT | CGTGCTGATTCTTTTTGGGC     |
| MSR1         | GCAGTGGGATCACTTTTCAAA   | AGCTGTCATTGAGCGAGCATC    |
| CD36         | GGCTGTGACCGGAACTGTG     | AGGTCTCCAACCTGGCATTAGAA  |
| LOX1         | AATGATAGAAACCCTTGC      | TTCCCAGTTAAATGAGCC       |
| SCARB1       | AATAAGCCCATGACCCTGAAGC  | GCCCCACATGATCTCACCC      |
| ABCA1        | ACCCACCCTATGAACAACATGA  | GAGTCGGGTAACGGAAACAGG    |
| ABCG1        | ATTCAGGGACCTTTTCTATTCGG | CTCACCCTATTGAACTTCCCG    |
| LDLR         | ACGGCGTCTCTTCTATGACA    | CCCTTGGTATCCGCAACAGA     |
| VLDLR        | AGAAAAGCCAAATGTGAACCCT  | CACTGCCGTCAACACAGTCT     |

---

|               |                          |                         |
|---------------|--------------------------|-------------------------|
| LRP1          | CTTCAAGAACGCAGTGGTG      | CAGTAGAGTTTGCTTTCAGGGA  |
| PPAR $\gamma$ | ACCAAAGTGCAATCAAAGTGGA   | ATGAGGGAGTTGGAAGGCTCT   |
| LXR $\alpha$  | CCTTCAGAACCCACAGAGATCC   | ACGCTGCATAGCTCGTTCC     |
| LXR $\beta$   | AGAAGATTCGGAAACAACAGCA   | GCTGGATCATTAGTTCTTGAGCC |
| p53           | CCACCATCCACTACAACACTACAT | AGGACAGGCACAAACACG      |
| Bax           | TCTGACGGCAACTTCAACTG     | AGGAAAACGCATTATAGACCAC  |
| Bcl-2         | CTGGGAGAACAGGGTACGATAA   | GGCTGGGAGGAGAAGATGC     |
| FAS           | GATGGCCAATTCTGCCATAAG    | GTCTGGTTCATCCCCATTGACT  |
| FADD          | GTGGCTGACCTGGTACAAGAG    | GGTAGATGCGTCTGAGTTCCAT  |
| caspase 3     | CATGGAAGCGAATCAATGGACT   | CTGTACCAGACCGAGATGTCA   |
| caspase 8     | GTTGTGTGGGGTAATGACAATCT  | TCAAAGGTCGTGGTCAAAGCC   |
| SRF           | CCGGCAAGGCACTGATTCA      | CTCATTCTCTGGTCTGTTGTGG  |
| GATA6         | CTCAGTTCCTACGCTTCGCAT    | GTCGAGGTCAGTGAACAGCA    |
| myocardin     | CCACCTATGGACTCAGCCTAC    | CTCAGTGGCGTTGAAGAAGAG   |
| KLF4          | CCCACATGAAGCGACTTCCC     | CAGGTCCAGGAGATCGTTGAA   |
| ACTA2         | AAAAGACAGCTACGTGGGTGA    | GCCATGTTCTATCGGGTACTTC  |
| OPN           | GAAGTTTCGCAGACCTGACAT    | GTATGCACCATTCAACTCCTCG  |
| ET1           | AGAGTGTGTCTACTTCTGCCA    | CTTCCAAGTCCATACGGAACAA  |
| AGT           | CCCCAGTCTGAGATGGCTC      | GACGAGGTGGAAGGGGTGTA    |
| ACE           | GGAGGAATATGACCGGACATCC   | TGGTTGGCTATTTGCATGTTCTT |
| TBXAS1        | GTATGGACCTCTGTGTGGGTA    | CCGACGCCATTCTGTTGGTAA   |
| eNOS          | TGATGGCGAAGCGAGTGAAG     | ACTCATCCATACACAGGACCC   |

---

---

|                |                         |                         |
|----------------|-------------------------|-------------------------|
| PTGIS          | CTGTTGGGCGATGCTACAGAA   | GCCTCAATTCCGTAAAGAGTCA  |
| MCP-1          | CTTCTGTGCCTGCTGCTCAT    | CGGAGTTTGGGTTTGCTTGTC   |
| CCL5           | CCAGCAGTCGTCTTTGTCAC    | CTCTGGGTTGGCACACACTT    |
| CXCL1          | CCCCAAGAACATCCAAAGTG    | GATGCAGGATTGAGGCAAG     |
| CXCL8          | GTCCTTGTTCCACTGTGCCT    | GCTTCCACATGTCCTCACAA    |
| CXCL10         | GTGGCATTCAAGGAGTACCTC   | TGATGGCCTTCGATTCTGGATT  |
| CXCL16         | CCCGCCATCGGTTTCAGTTC    | CCCCGAGTAAGCATGTCCAC    |
| MIF            | GAACCGCTCCTACAGCAAGCT   | GCGAAGGTGGAGTTGTTCCA    |
| MIP-1 $\alpha$ | AGTTCTCTGCATCACTTGCTG   | CGGCTTCGCTTGTTAGGAA     |
| ICAM1          | TTGGGCATAGAGACCCCGTT    | GCACATTGCTCAGTTCATACACC |
| VCAM1          | GGGAAGATGGTCGTGATCCTT   | TCTGGGGTGGTCTCGATTTTA   |
| E-selectin     | GCACAGCCTTGTCCAACC      | ACCTCACCAAACCCTTCG      |
| P-selectin     | ATGGGTGGGAACCAAAAAGG    | GGCTGACGGACTCTTGATGTAT  |
| VEGFA          | AGGGCAGAATCATCACGAAGT   | AGGGTCTCGATTGGATGGCA    |
| VEGFB          | GAGATGTCCCTGGAAGAACACA  | GAGTGGGATGGGTGATGTCAG   |
| VEGFC          | GAGGAGCAGTTACGGTCTGTG   | TCCTTTCCTTAGCTGACACTTGT |
| VEGFR2         | GGCCCAATAATCAGAGTGGCA   | CCAGTGTCATTTCCGATCACTTT |
| Ang1           | AGCGCCGAAGTCCAGAAAAC    | TACTCTCACGACAGTTGCCAT   |
| Ang2           | CTCGAATACGATGACTCGGTG   | TCATTAGCCACTGAGTGTTGTTT |
| Tie2           | TTAGCCAGCTTAGTTCTCTGTGG | AGCATCAGATACAAGAGGTAGGG |
| PDGFA          | GCAAGACCAGGACGGTCATTT   | GGCACTTGACACTGCTCGT     |
| PDGFB          | CTCGATCCGCTCCTTTGATGA   | CGTTGGTGCGGTCTATGAG     |

---

---

|        |                         |                         |
|--------|-------------------------|-------------------------|
| PDGFR1 | TTTTTGTGACGGTCTTGGAAGT  | TGTCTGAGTGTGGTTGTAATAGC |
| PDGFR2 | TGATGCCGAGGAACTATTCATCT | TTTCTTCTCGTGCAGTGTCAC   |

---

**Table S2. Primers designed for promoter reporter gene construction**

| <b>Gene</b>  | <b>Primers</b>                                        | <b>Promoter region<br/>(bp)</b> | <b>Promoter length<br/>(bp)</b> |
|--------------|-------------------------------------------------------|---------------------------------|---------------------------------|
| <b>MMP1</b>  | F ATCTGCCACTCCTTGACT<br>R GCTTCCCTTAATCTTTACTC        | -1784 ~ -466                    | 1319                            |
| <b>MMP2</b>  | F CAAGACATAATCGTGACCTCCAAT<br>R ACCGCCTGAGGAAGTCTGGAT | -1556 ~ +55                     | 1611                            |
| <b>MMP3</b>  | F TATTATCTATCAGGCTTTCC<br>R TTTCCACTGGCTTTACTT        | -1870 ~ +66                     | 1936                            |
| <b>MMP7</b>  | F TAGGATTACAGGCGTGAG<br>R TTGGACCTATGGTTGATTTG        | -1601 ~ +22                     | 1623                            |
| <b>MMP8</b>  | F TACTCTAGCACCCATCAC<br>R CTTTCTTTCTGTCCCTCT          | -1399 ~ +69                     | 1468                            |
| <b>MMP9</b>  | F GCCCAAGGTCACATAGCT<br>R CTCCAGGGAAGAGCACAA          | -1932 ~ +199                    | 2051                            |
| <b>MMP10</b> | F ATGGCAGCACAGTAGGTT<br>R ATTGGCTAGATAATTCACGT        | -1936 ~ -214                    | 1723                            |
| <b>MMP11</b> | F AGGCCCTTCATCATTTTCAG<br>R GGCAAAGTCCCTATCTGGT       | -1538 ~ -185                    | 1354                            |
| <b>MMP12</b> | F AATGGAGTAGCCTGTAAT<br>R CTTTCTAGCCTAAGTTCC          | -1812 ~ +58                     | 1870                            |
| <b>MMP13</b> | F CTCTAAGGCACTGGCTAC                                  | -1616 ~ +170                    | 1776                            |

---

|                   |                          |              |      |
|-------------------|--------------------------|--------------|------|
|                   | R AGGATTGGCAAGATACTC     |              |      |
| <b>MMP14</b>      | F TAGGCCATGTACAGCTGGCATC | -1541 ~ +162 | 1703 |
|                   | R ACCGCTGTCTGGCTTGGAGTT  |              |      |
| <b>TIMP1</b>      | F TCACCCGAGGTCAGGAGT     | -1882 ~ +10  | 1892 |
|                   | R GCCGACGAAAGGAGATACAC   |              |      |
| <b>TIMP2</b>      | F CGCCTCTCGGGTTCAAGCGA   | -1559 ~ +30  | 1589 |
|                   | R CGCGCTGCCTTCTACGGATG   |              |      |
| <b>TIMP3</b>      | F TATTAGGCTCATGGACACC    | -1744 ~ -68  | 1677 |
|                   | R AGAAAGGCAAGAGGAAGT     |              |      |
| <b>TIMP4</b>      | F CTACACTGAGGTAGCCATAC   | -1541 ~ +183 | 1724 |
|                   | R GAAAGAGCCACAAAGACA     |              |      |
| <b>ICAM1</b>      | F CTGCCCTGTCATCTCCCT     | -1753 ~ -86  | 1668 |
|                   | R TCCATTTCACAAAGCGGTA    |              |      |
| <b>VCAM1</b>      | F CTGGGAGGAGCAGGTAGGA    | -1718 ~ +66  | 1784 |
|                   | R TTGTTGCAGAGGCGGAGG     |              |      |
| <b>E-selectin</b> | F TTTGGGTCTTGACATCTT     | -1903 ~ +67  | 1970 |
|                   | R GGTATCACTGCTGCCTCT     |              |      |
| <b>P-selectin</b> | F AGCGTGATAGGTATTGTT     | -1822 ~ +61  | 1883 |
|                   | R TCTGTGACTCTGCTGGTT     |              |      |

---

**Table S3. Specific primers used in Chromatin immunoprecipitation Assay**

| <b>Gene</b> | <b>Putative binding site of Nkx2-5</b>             | <b>Primers</b>                 | <b>Product length (bp)</b> |
|-------------|----------------------------------------------------|--------------------------------|----------------------------|
| <b>MMP1</b> | <b>seq1</b> GGGCTCAAGTGATTCCCCT<br>(-559 ~ -541)   | <b>F</b> ACCTCAGCCTCTTCAGTG    | 194                        |
|             |                                                    | <b>R</b> GCTCAAGCCTATAATCCC    |                            |
|             | <b>seq2</b> TAAAGTGAGTGCTGGGGGA<br>(-387 ~ -369)   | <b>F</b> GGCAGCTTAACAAAGGCAGAA | 144                        |
|             |                                                    | <b>R</b> CAGGGCAGAGGGTGGAAAT   |                            |
| <b>MMP2</b> | <b>seq1</b> AGACATAATCGTGACCTCC<br>(-1555 ~ -1536) | <b>F</b> CTGAAGCCCACTGAGACC    | 141                        |
|             |                                                    | <b>R</b> GCAGGGAACAGTTTGAGAA   |                            |
|             | <b>seq2</b> AAGAGTGAGTGGGGAATTC<br>(-1015 ~ -999)  | <b>F</b> GCTGAAGTCAGGCGTTCC    | 214                        |
|             |                                                    | <b>R</b> AGCCCTCAGTTCCACGAA    |                            |
| <b>MMP3</b> | <b>seq1</b> AGGAGAATCACTTGAGCCC<br>(-1499 ~ -1481) | <b>F</b> CTGCCACCACTCTGTTCT    | 211                        |
|             |                                                    | <b>R</b> TGGGCTCAAGTGATTCTCC   |                            |
|             | <b>seq2</b> TCCAATGTTTATTAAGAAA<br>(-1264 ~ -1246) | <b>F</b> TCTTCAGTCATAGGGATC    | 162                        |
|             |                                                    | <b>R</b> AGACCTTTAATAAGTGCC    |                            |
|             | <b>seq3</b> TG TTCAGGTAATTAACACT<br>(+164 ~ +182)  | <b>F</b> AGACAACATAGAGCTAAG    | 168                        |
|             |                                                    | <b>R</b> CCACCTGGCCAGGTCAGT    |                            |
| <b>MMP7</b> | <b>seq1</b> TGCTCATTCACTTGAGGAA<br>(-1523 ~ -1505) | <b>F</b> TTTCCCAGGCTTGTCTCA    | 200                        |
|             |                                                    | <b>R</b> TTTTGGTAATATTTGCAT    |                            |
|             | <b>seq2</b> AAAGAAAACACTCAAATGA<br>(-83 ~ -65)     | <b>F</b> CTGCCAATAACGATGTAA    | 132                        |
|             |                                                    | <b>R</b> CTTCTCAGCCTCGAATGT    |                            |



---

|              |                                                    |                                                                 |     |
|--------------|----------------------------------------------------|-----------------------------------------------------------------|-----|
|              | <b>seq3</b> AGGCATGAGTGAGCTACAG<br>(+122 ~ +140)   | <b>F</b> AGCTATGCGACTCACCGTG<br><b>R</b> AGATGGCAAAGAATGGAA     | 157 |
| <b>MMP8</b>  | <b>seq1</b> AGACTCAAGTGGGAGACTA<br>(-825 ~ -807)   | <b>F</b> CCTTGTCTTCTGCCTGTG<br><b>R</b> TGTTTCATTTGTGGAGGG      | 187 |
|              | <b>seq2</b> AATCATAATTTTTAGCAA<br>(-583 ~ -565)    | <b>F</b> ACAAATGTCTGGGCAATC<br><b>R</b> CTTCTGGAGGATGTGGTT      | 145 |
|              | <b>seq3</b> TAAGTTAATTCAACCTCAA<br>(-303 ~ -285)   | <b>F</b> CCACATACAATGAGGGAG<br><b>R</b> AAAGGAACAAGGGACTAA      | 172 |
|              | <b>seq4</b> AGCTGTGAGTGACACATGA<br>(-10 ~ +9)      | <b>F</b> CCTATGTTGCTTCATATT<br><b>R</b> GAAATGGAAGCGTCTTCAGG    | 204 |
| <b>MMP9</b>  | <b>seq1</b> GAAGTTAATTATCTCCATC<br>(-1617 ~ -1598) | <b>F</b> AATCCAGGACTTCGTGAC<br><b>R</b> TAAAGGGCCTACTATGTG      | 151 |
|              | <b>seq2</b> GGGCAGATCACTTGAGTCA<br>(-1474 ~ -1455) | <b>F</b> CCCGTAATCCTAGCACTT<br><b>R</b> TGTAGTATCACTCTGTCACCC   | 257 |
|              | <b>seq3</b> TGTGATAATTGGGGCTGGA<br>(-1072 ~ -1053) | <b>F</b> TTTCCAGGCTTGTCTCA<br><b>R</b> TTTTGTAATATTTGCAT        | 201 |
| <b>MMP10</b> | <b>seq1</b> ATTATCAAGAATTATGTAC<br>(-1985 ~ -1967) | <b>F</b> AGTCATTTATCACTATTAT<br><b>R</b> AAGTTACCCAGTCTCAGG     | 231 |
|              | <b>seq2</b> GAACATAATTATACACTGG<br>(-613 ~ -595)   | <b>F</b> AGCAAAGAAGAGGAAGAGGGTA<br><b>R</b> TACTGGCCGTGGAGTAGGG | 209 |
|              | <b>seq3</b> CTACTTAATTCTTACCTGC<br>(-365 ~ -347)   | <b>F</b> CCACATTTAGACCACGAC<br><b>R</b> AAGCAGGTAAGAATTAAGTAGG  | 65  |

---

---

|              |                                                    |                                                                    |     |
|--------------|----------------------------------------------------|--------------------------------------------------------------------|-----|
|              | <b>seq4</b> TCCTCTGAGTGGGGCAGCA<br>(+91 ~ +109)    | <b>F</b> CCAGTAGACAAAGAAGGTA<br><b>R</b> TCCTTGTGGAGTCCTCCT        | 126 |
| <b>MMP11</b> | <b>seq1</b> GGGTTCAAGTGATTCTCCT<br>(-1330 ~ -1311) | <b>F</b> AGTCTCGCTCTGTCACCC<br><b>R</b> CCTGTAAGCCCAGCTACTC        | 119 |
|              | <b>seq2</b> CAGTACTCCACTCAGACAC<br>(-1034 ~ -1015) | <b>F</b> TTCTTTCAAGTCTGAGGTGGCT<br><b>R</b> TGGGAGGTGTCTGAGTGGAGTA | 105 |
|              | <b>seq3</b> GGGCAGATCACTTGAGGTC<br>(-745 ~ -726)   | <b>F</b> TTCCCTATCTGTAACTTCGG<br><b>R</b> GACCTCAAGTGATCTGCCACC    | 173 |
|              | <b>seq4</b> TGCAGTGAGTGGAGATCAC<br>(-578 ~ -559)   | <b>F</b> GCGGAGGTTGCAGTGAGTGG<br><b>R</b> CCCTGTGAGGAAAGGGATA      | 119 |
| <b>MMP12</b> | <b>seq1</b> TTAAGCCTCACTCAAGCAG<br>(-1006 ~ -988)  | <b>F</b> ATCACAGAAGGCAAGTCT<br><b>R</b> ATTGCTCTTACCCACCTC         | 284 |
|              | <b>seq2</b> TTAGAAAGCACTCATTTAC<br>(-382 ~ -364)   | <b>F</b> GATCTGAGCCGGTACAAC<br><b>R</b> CTTAAAGCCTGATATTCTTG       | 242 |
|              | <b>seq3</b> TTGCTTGAGTGATGGACTA<br>(-130 ~ -112)   | <b>F</b> GGATAGGTGGACGTAGAGG<br><b>R</b> AGTCCGGGTTCTGTGAAT        | 195 |
| <b>MMP13</b> | <b>seq1</b> CTCTTAGTCACTCAAATTA<br>(-1263 ~ -1245) | <b>F</b> CTGGCTACTCTAGATTATA<br><b>R</b> CTTTAAATAAATGATTGG        | 177 |
|              | <b>seq2</b> ACCTTCAAGTGA CTGGGAA<br>(-90 ~ -72)    | <b>F</b> AGTCGCCACGTAAGCATG<br><b>R</b> TCACCACCACTGGGAAGG         | 220 |
| <b>MMP14</b> | <b>seq1</b> TGACCTAATTTCTGTCCAC<br>(-1035 ~ -1016) | <b>F</b> CTTCTATTCTTCTGCCACA<br><b>R</b> GACTATCAGCGAAATCTAA       | 180 |

---

---

|              |                                                    |                                                              |     |
|--------------|----------------------------------------------------|--------------------------------------------------------------|-----|
|              | <b>seq2</b> GCGAGTTCCAATTAAGGT<br>(-591 ~ -572)    | <b>F</b> AGTCCCAACTCCCAATCC<br><b>R</b> TCTGTGGCTCCAACCTTT   | 178 |
|              | <b>seq3</b> AATCAAGCCACTCAGAATA<br>(-243 ~ -224)   | <b>F</b> CCAATAATTCCCACCCTG<br><b>R</b> ACACCTCTAAGTTGCCTTTT | 189 |
| <b>TIMP1</b> | <b>seq1</b> TACTGACCCACTCACTTGC<br>(-833 ~ -814)   | <b>F</b> GGAAGGTTCTGCATTGTC<br><b>R</b> AAAGAAGCAAGTGAGTGGGT | 142 |
|              | <b>seq2</b> AGCTTTGAGTGAGATAAAC<br>(-576 ~ -557)   | <b>F</b> AAAACGGGAATAAGAACC<br><b>R</b> GAGTCAATACATGGCAGAAC | 189 |
|              | <b>seq3</b> TATGCTGAGTGCCTGGTAT *<br>(-557 ~ -538) | <b>F</b> AAAACGGGAATAAGAACC<br><b>R</b> GAGTCAATACATGGCAGAAC | 189 |
| <b>TIMP2</b> | <b>seq1</b> GGCCTCAAGTGATCCTCCT<br>(-1096 ~ -1078) | <b>F</b> GGCCTCAAGTGATCCTCCT<br><b>R</b> AGAGGGAAGCCCAGGAAA  | 197 |
|              | <b>seq2</b> TGACCTGAGTGCAGCAGTG<br>(-937 ~ -919)   | <b>F</b> CGCCCTGATTCTTCCTGT<br><b>R</b> GCTGTGAACCTGCCTGTG   | 186 |
| <b>TIMP3</b> | <b>seq1</b> TGCTTTCATAATTAAGTAG<br>(-1421 ~ -1402) | <b>F</b> GTAATTCGTTACTTTTCAG<br><b>R</b> AGCAGCAGTTTTCTCATA  | 113 |

---

\* The “seq3” of TIMP2 could not be distinguished from “seq2” by specific primers since the two binding sites get close to each other

**Table S4. Plasma lipid profiles and body weights of adenovirus treated ApoE<sup>-/-</sup> mice fed standard chow diet or western diet.**

|                           | <b>Standard Chow Diet (20 weeks)</b>           |                  |              |                    |
|---------------------------|------------------------------------------------|------------------|--------------|--------------------|
|                           | <b>Ad-EV</b>                                   | <b>Ad-Nkx2-5</b> | <b>Ad-EV</b> | <b>Ad-shNkx2-5</b> |
| Total cholesterol (mg/dl) | 272.3±36.6                                     | 331.1±60.9       | 306.6±24.2   | 277.4±58.2         |
| Triglycerides (mg/dl)     | 64.1±9.2                                       | 58.3.2±9.2       | 55.9±5.2     | 60.6±8.5           |
| LDL cholesterol (mg/dl)   | 331.1.4±55.2                                   | 301.0±40.4       | 322.4.4±35.2 | 349.7±68.9         |
| HDL cholesterol (mg/dl)   | 45.3±6.1                                       | 41.4±7.9         | 48.3±5.2     | 46.7±6.0           |
| Body weight (g)           | 33.1±4.5                                       | 31.9±2.8         | 32.8±6.4     | 34.1±6.2           |
|                           | <b>Western Diet (from 6 weeks to 22 weeks)</b> |                  |              |                    |
|                           | <b>Ad-EV</b>                                   | <b>Ad-Nkx2-5</b> | <b>Ad-EV</b> | <b>Ad-shNkx2-5</b> |
| Total cholesterol (mg/dl) | 1213.2±105.7                                   | 1157.5±92.4      | 1202.6±155.1 | 1277±163.1         |
| Triglycerides (mg/dl)     | 125.7±19.9                                     | 118.2±15.5       | 120.6±9.8    | 122.4±16.9         |
| LDL cholesterol (mg/dl)   | 882.4±95.1                                     | 901.2±107.8      | 910.4±88.2   | 892.5±101.2        |
| HDL cholesterol (mg/dl)   | 40.1±6.2                                       | 44.3±5.7         | 41.7±3.9     | 42.4±5.1           |
| Body weight (g)           | 29.7±2.2                                       | 30.9±2.8         | 31.5±2.4     | 30.2±3.7           |

LDL, low-density lipoprotein; HDL, high-density lipoprotein

**Figure S1. Nkx2-5 expression in aortic sinus and aorta of diseased ApoE<sup>-/-</sup> and normal C57BL/6 mice.**

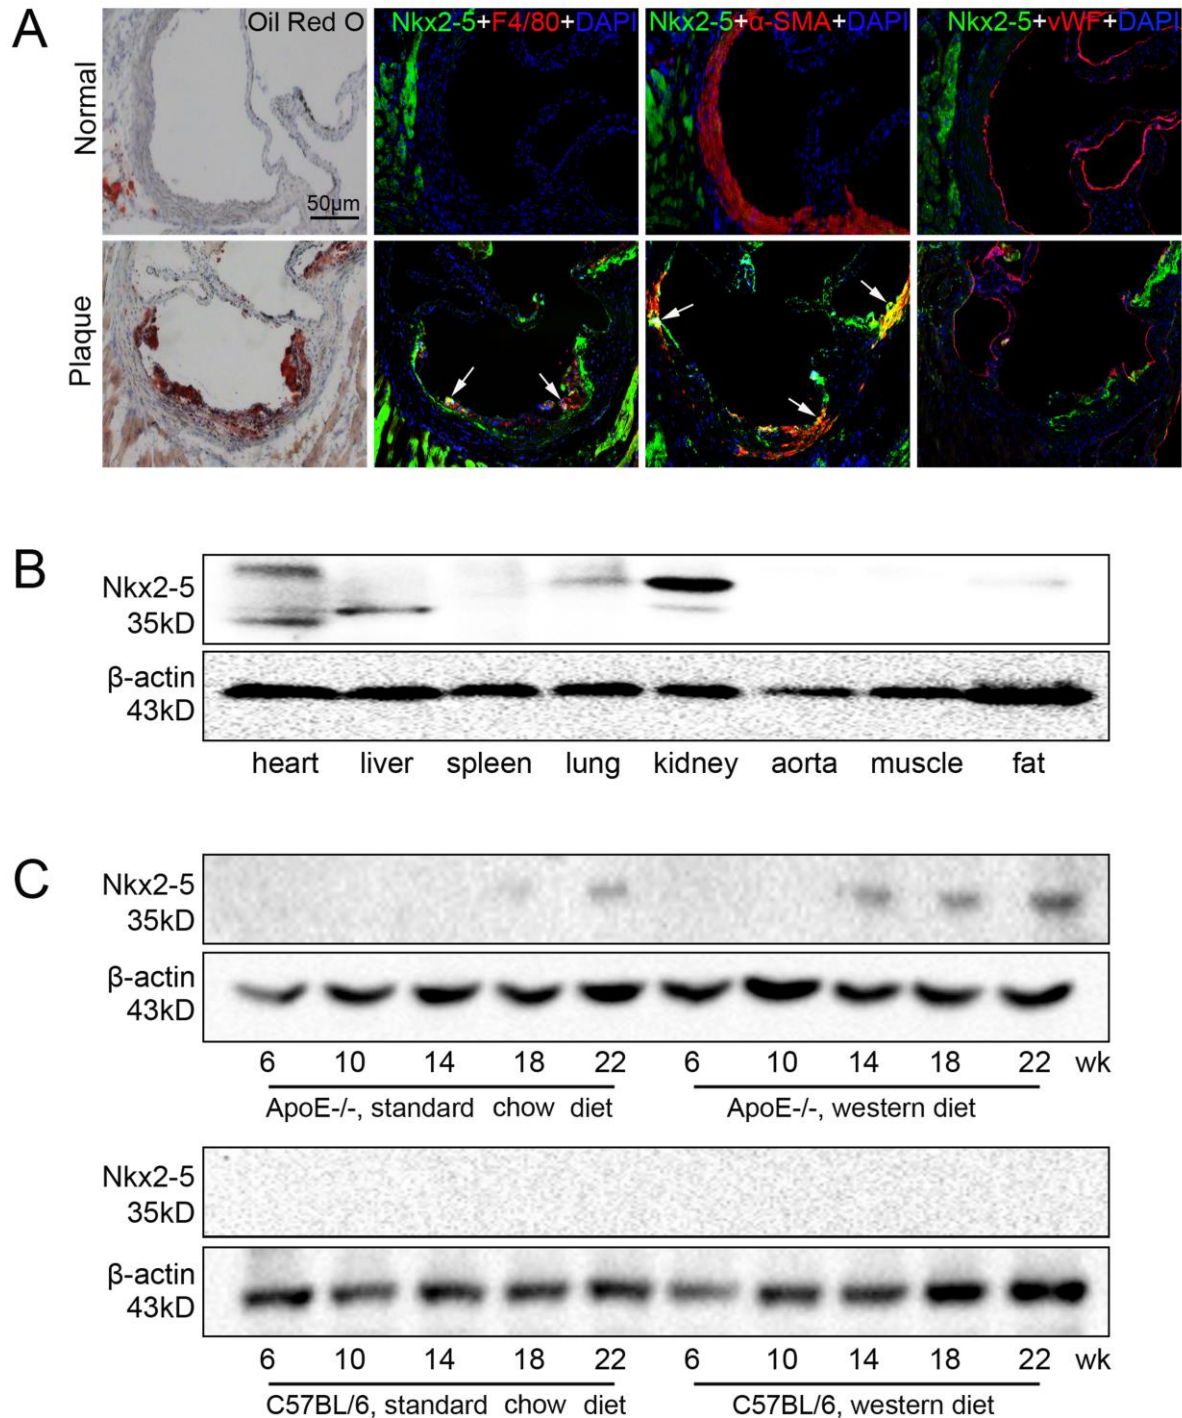

**A.** Immunofluorescence assay of Nkx2-5 in aortic sinus of C57BL/6 mice (normal, upper) and ApoE<sup>-/-</sup> mice (plaque, lower). For colocalization analysis, sections were co-stained for Nkx2-5

(green) and F4/80 (red, macrophage marker),  $\alpha$ -SMA (red, smooth muscle cell marker) or von Willebrand Factor (red, vWF, endothelial marker). 4',6-diamidino-2-phenylindole (DAPI) was used for nucleus staining (blue). Arrows indicate Nkx2-5 and cell specific marker double positive cells. n=4 for C57BL/6 and 5 for ApoE<sup>-/-</sup> mice. **B.** Expression and distribution of Nkx2-5 in C57BL/6 mice. **C.** The temporal expression pattern of Nkx2-5 in the aorta of ApoE<sup>-/-</sup> and C57BL/6 mice, fed with standard chow diet or western diet respectively. n=6 for each group.

**Figure S2. Adenovirus infection efficiency in arterial walls of experimental atherosclerotic mice was examined by Western blot.**

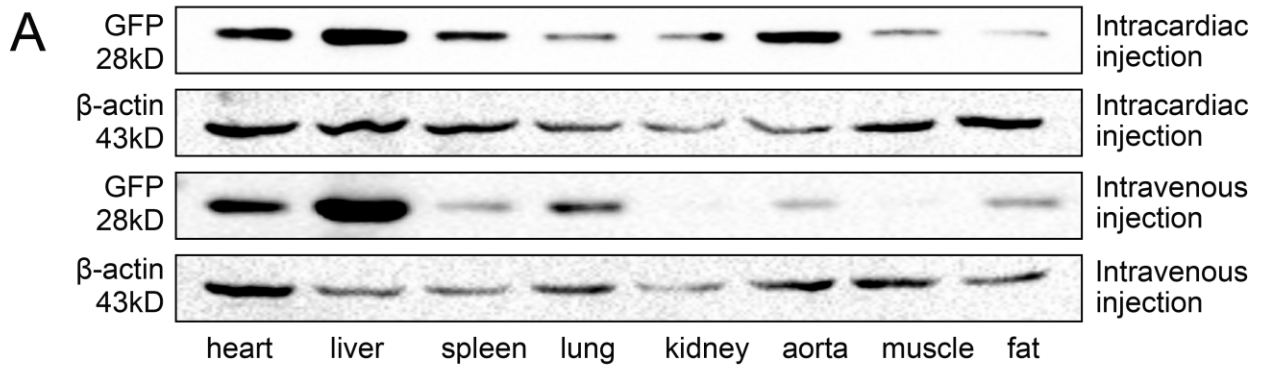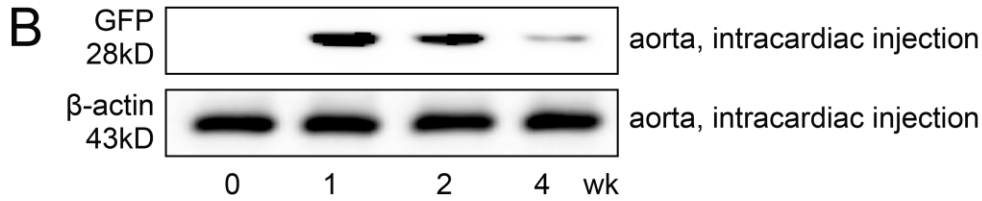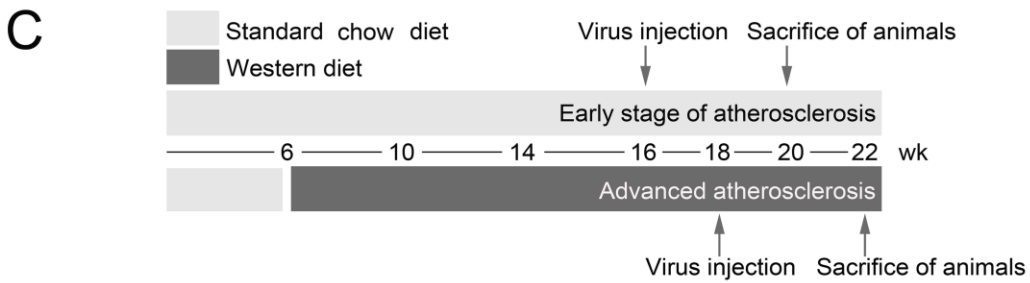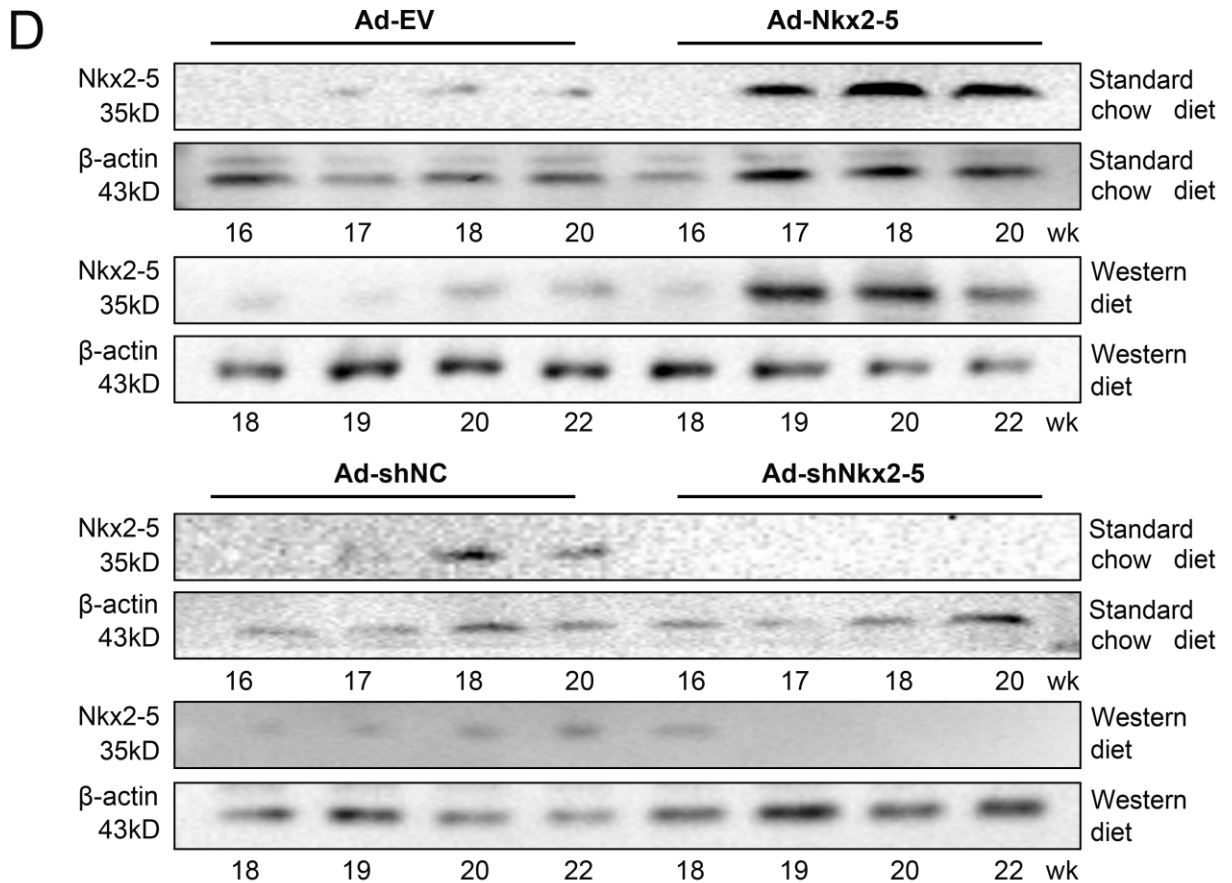



**A.** Expression of GFP in various tissues of mice at 1 week after virus administration intraventricularly or intravenously. **B.** Levels of GFP expression in aortic tissue at 1, 2, or 4 weeks after virus administration intraventricularly. **C.** Experimental design. Two types of atherosclerotic lesions (referred to as early and advanced stage) were created in ApoE<sup>-/-</sup> mice through 2 different dietary manipulations. Four weeks before sacrificed, adenovirus was delivered by intraventricular injection. **D.** Expression levels of Nkx2-5 in aorta of mice treated with either Ad-EV, Ad-Nkx2-5, Ad-shNC or Ad-shNkx2-5 at indicated time points.

**Figure S3. The lymphocytes subtypes were not affected by Nkx2-5 gene transfer.**

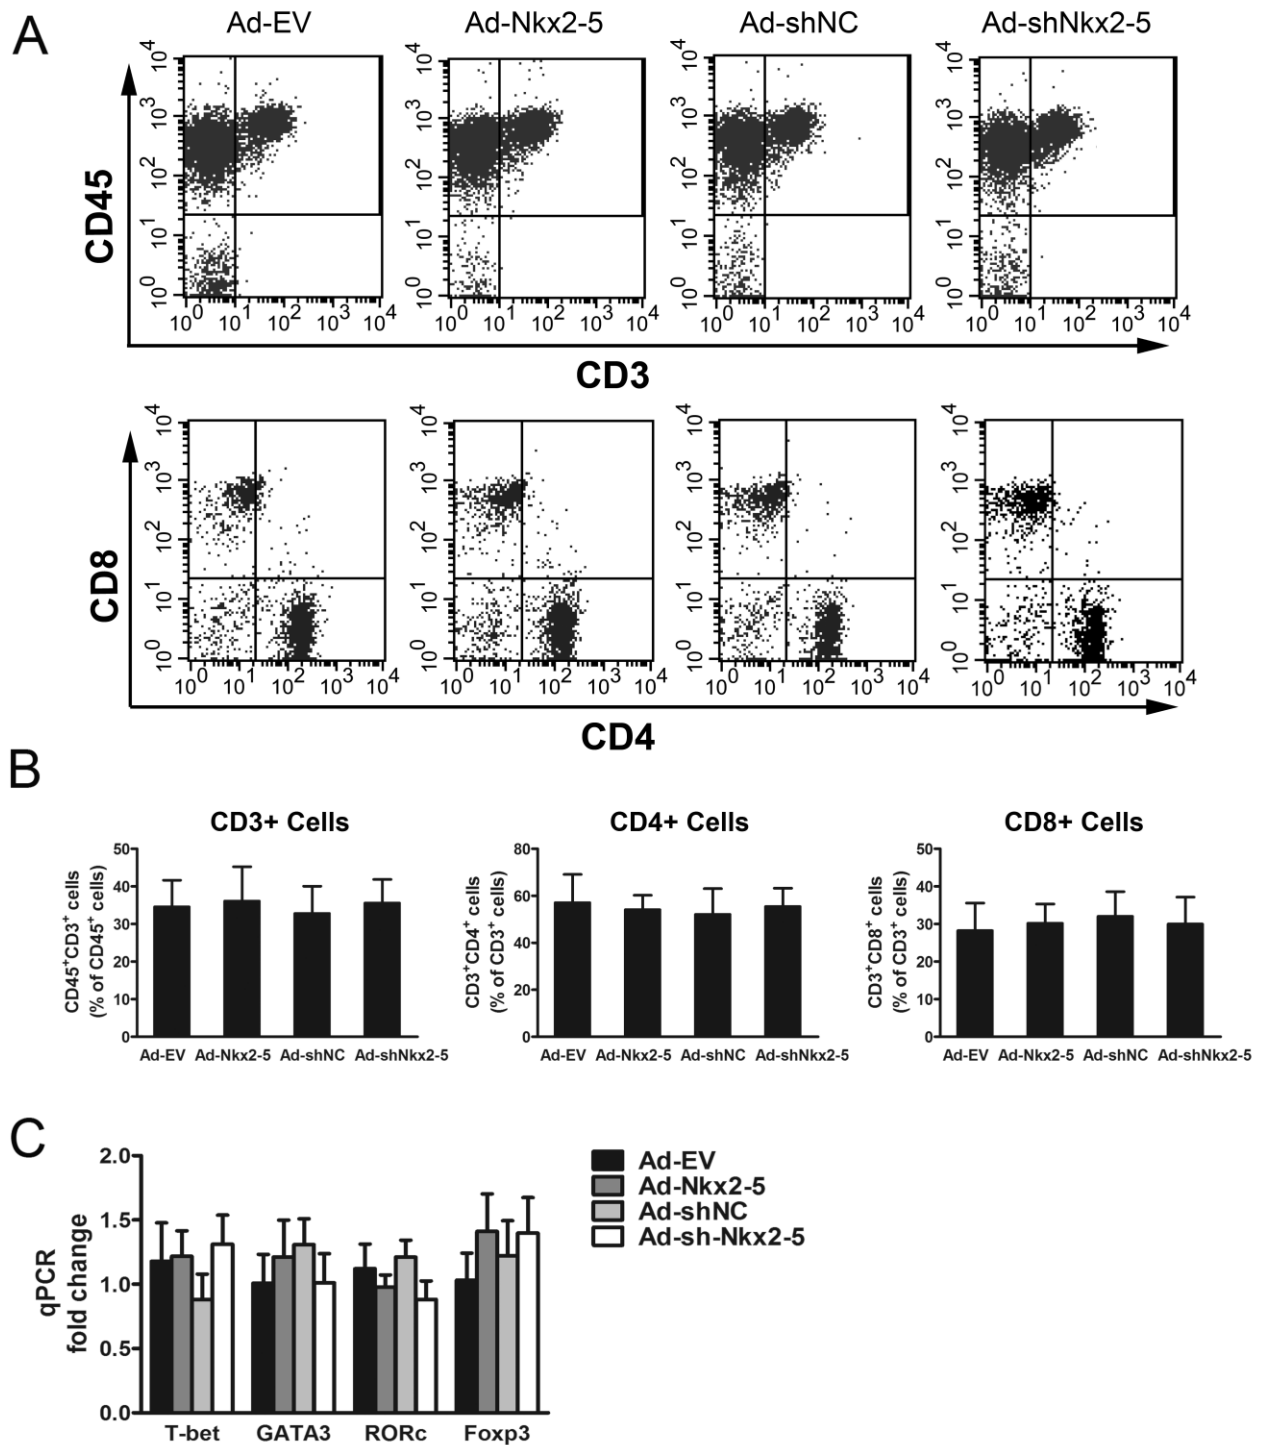

**A.** The profile of CD3<sup>+</sup>, CD4<sup>+</sup> and CD8<sup>+</sup> cells were determined by flow cytometry in the spleen of Western diet fed ApoE<sup>-/-</sup> mice treated with Ad-EV, Ad-Nkx2-5, Ad-shNC or Ad-shNkx2-5. **B.**

Quantitative analysis of % CD3<sup>+</sup> cells, % CD4<sup>+</sup> cells and % CD8<sup>+</sup> cells in panel **A**. Data are expressed as mean  $\pm$  SEM (n=8 for Ad-EV, 7 for Ad-Nkx2-5, 8 for Ad-NC and 10 for Ad-shNkx2-5 treated mice). **C**. Relative mRNA expression of transcription factors representative for T-cell subsets is measured in the spleen of Western diet fed ApoE<sup>-/-</sup> mice treated with Ad-EV, Ad-Nkx2-5, Ad-shNC or Ad-shNkx2-5. Data are expressed as mean  $\pm$  SEM (n=8 per group).

**Figure S4. Chromatin immunoprecipitation assay of Nkx2-5 interaction with the promoters of MMPs and TIMPs.**

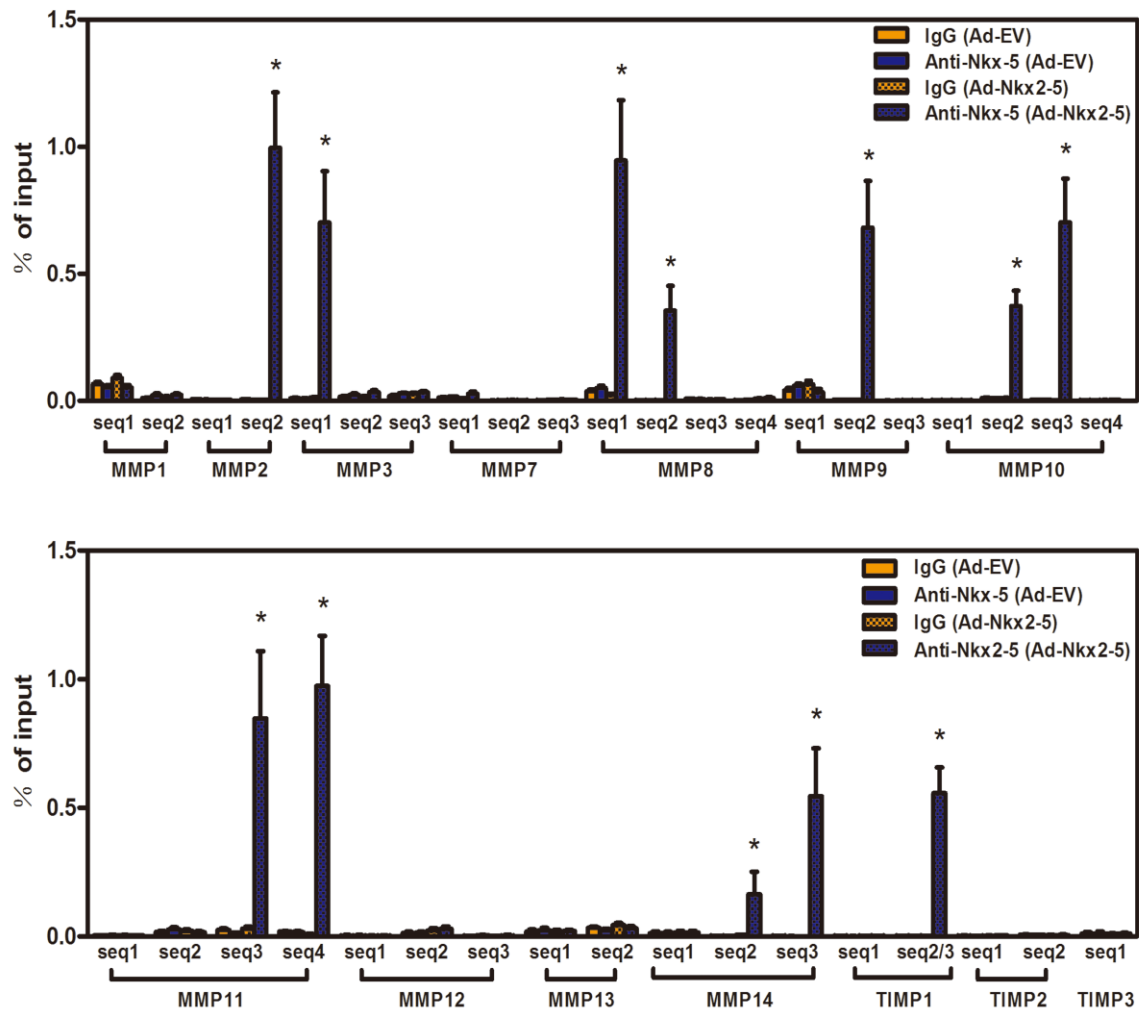

Chromatin immunoprecipitation assay was performed in human monocytic leukemia cell line (THP1) derived macrophages. IgG was used as a negative control. The putative Nkx2-5 binding sites of each MMP or TIMP promoter were denoted as “seq-No.”. Values are expressed as percent of amplified signals from IP chromatin to amplified input signals obtained from the same sample. Data are expressed as mean±SEM of three independent experiments. \*  $P < 0.05$  vs. IgG (Ad-Nkx2-5) group.

**Figure S5. Effects of Nkx2-5 on MMP3, MMP8, MMP14 and TIMP1 expression in ApoE<sup>-/-</sup> mice fed western diet.**

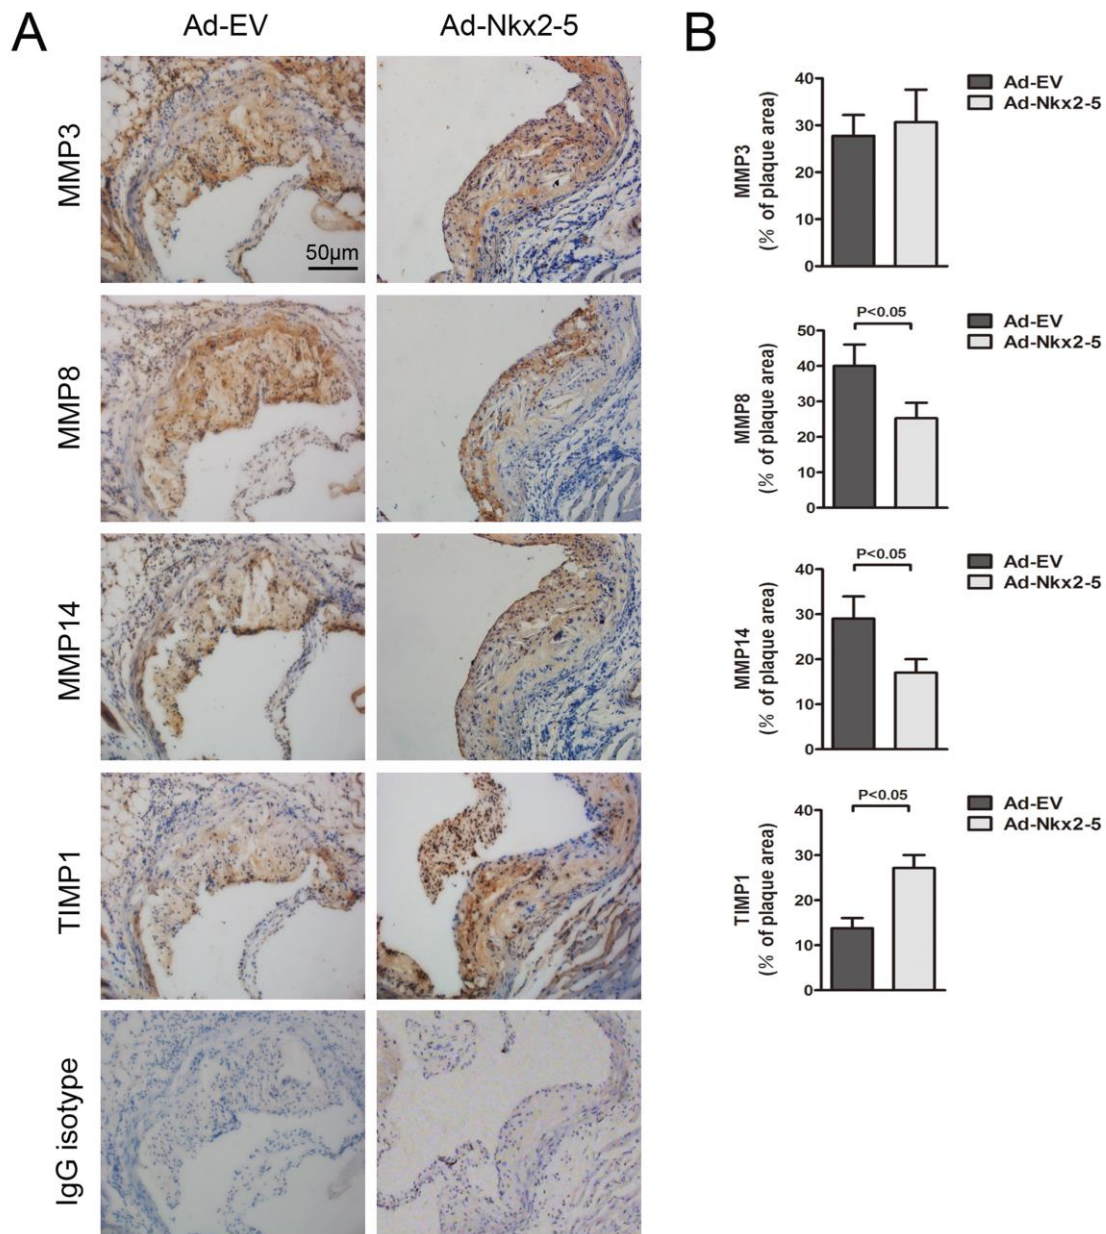

**A.** Cross-sections of aortic sinus were immunostained with antibodies against MMP3, MMP8, MMP14 and TIMP1. Staining with rabbit IgG isotype was used as the negative control. **B.** Quantification of the histochemical staining of MMP3, MMP8, MMP14 and TIMP1. Positive stained areas were quantified as a percentage of total plaque area. Data are expressed as mean±SEM (n=12 per group).

**Figure S6. Nkx2-5 regulates the expression of adhesion molecules at transcriptional level in endothelial cells.**

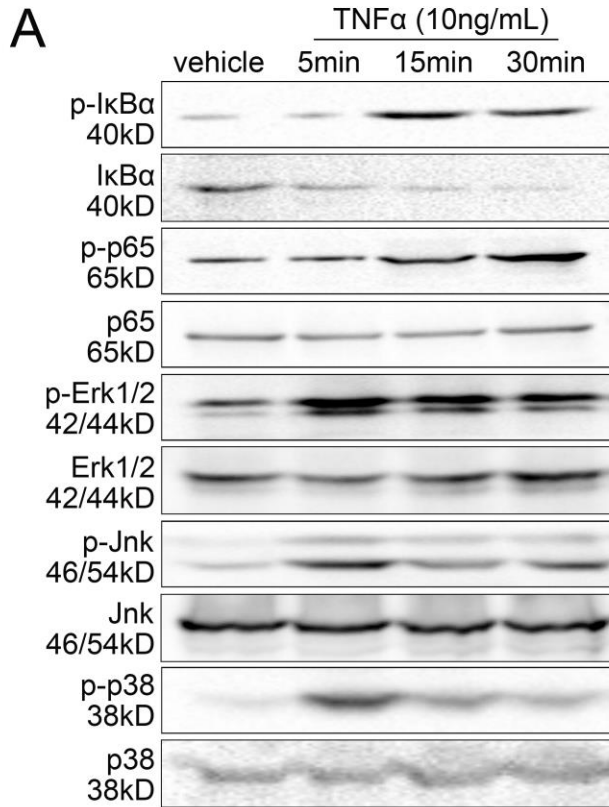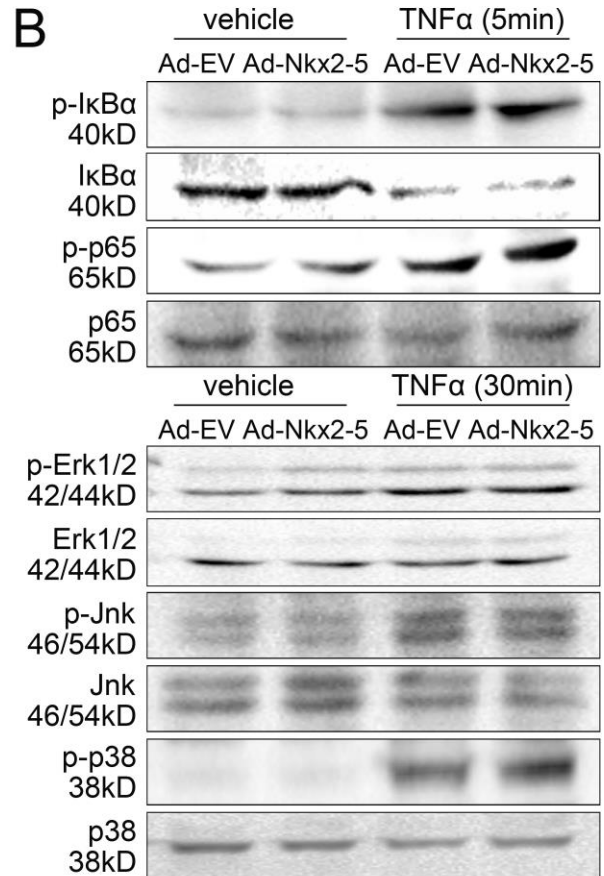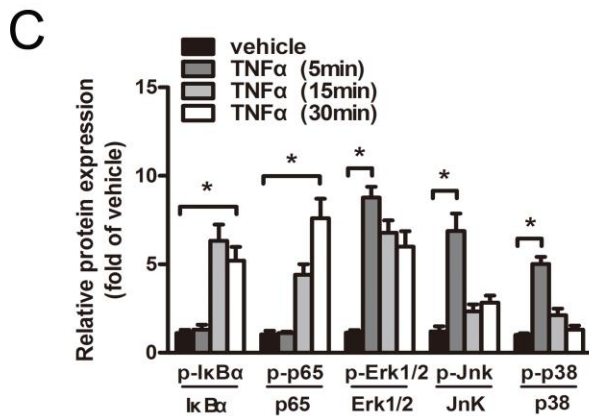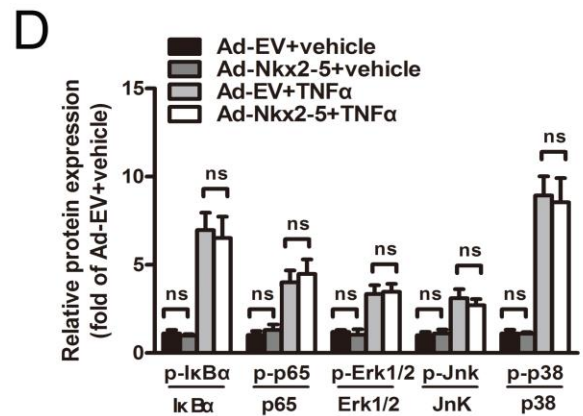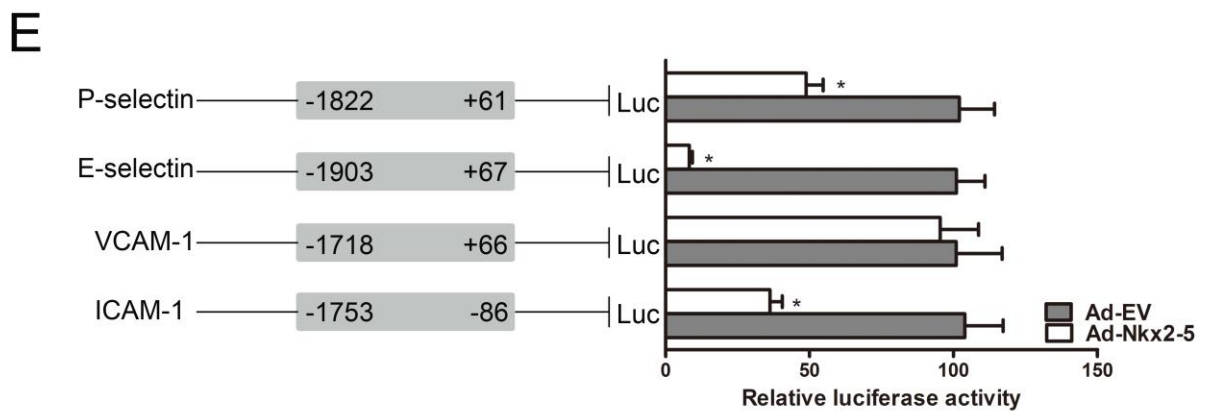

**A.** Human aortic endothelial cells were stimulated with TNF $\alpha$  (10ng/mL) for 5min, 10min and 30min. Western blot shows the phosphorylation levels of nuclear factor-kappaB (NF- $\kappa$ B) and mitogen-activated protein kinase (MAPK) signaling pathways at indicated time points. **B.** The effects of Nkx2-5 on the phosphorylation levels of NF- $\kappa$ B and MAPK pathways were examined by Western blot, either in the resting endothelial cells or TNF $\alpha$ -activated endothelial cells (5min for MAPK pathway and 30min for NF- $\kappa$ B pathway). **C.** Quantification of band density in **A.** Results are expressed as fold of vehicle group. Data represent the mean $\pm$ SEM of three independent experiments. \*  $P < 0.05$  vs. vehicle group. **D.** Quantification of band density in **B.** Results are expressed as fold of Ad-EV+vehicle group. Data represent the mean $\pm$ SEM of three independent experiments. *ns*, no significance. **E.** Luciferase reporter constructs containing promoters of ICAM-1, VCAM-1, E-selectin and P-selectin were co-transfected with an internal control plasmid pRL-TK into HEK293 cells, followed by infection with Ad-Nkx2-5 or Ad-EV. Schematic representation in the left panel demonstrates the range of promoters, and the numbers indicate nucleotide positions relative to the transcription initiation site. The right panel demonstrates the relative luciferase activities, which are expressed as a percent of values determined in Ad-EV treated group. Data represent the mean $\pm$ SEM of three independent experiments. \*  $P < 0.05$  vs. Ad-EV treated group.
